# Supplementary figures and images for: Room temperature fabrication of ZnO nanorod films: synthesis and application as a channel layer of transparent thin film transistors
Source: Royal Society of Chemistry journal article supplement (doi:10.1039/b908219k), 2009-01-01

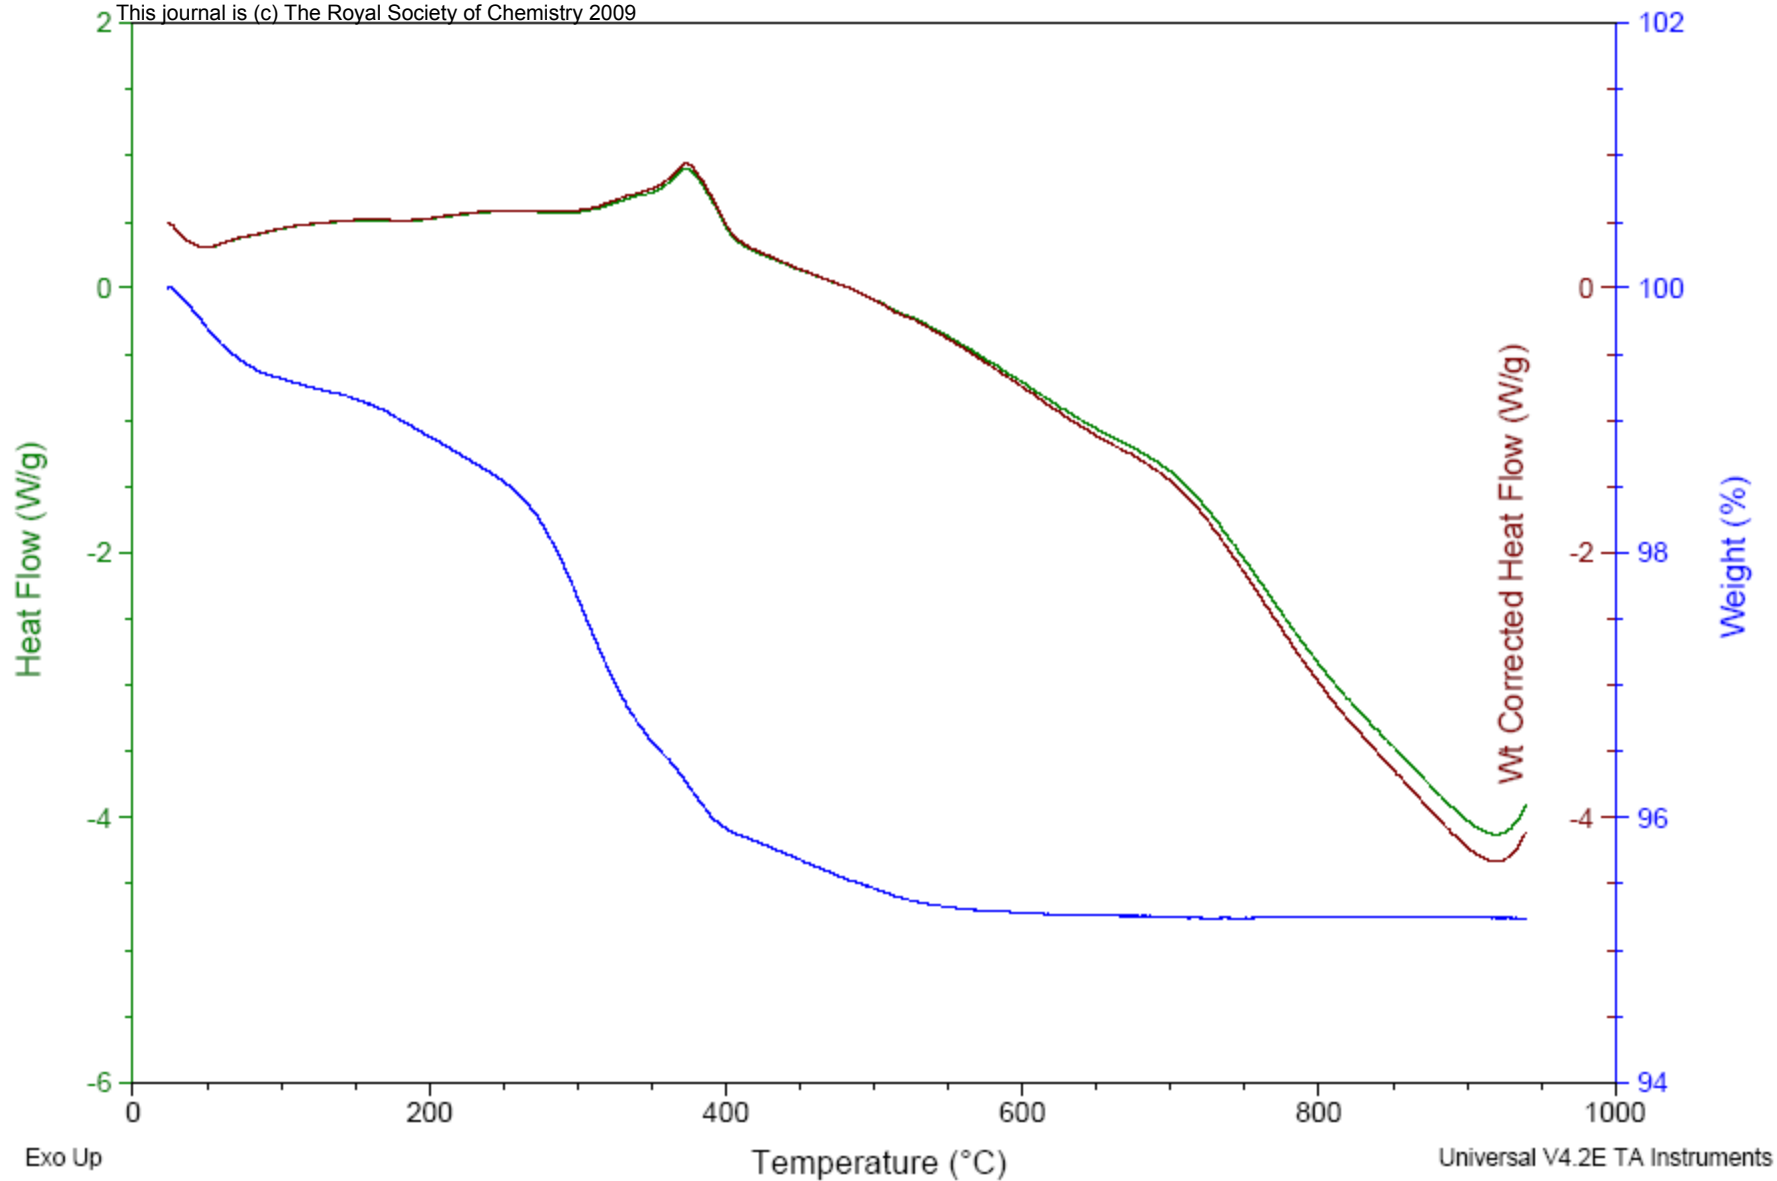

Supplement: b908219k.pdf [file b908219k.pdf]
